# Supplementary material
Source: PubMed Central journal article supplement (PMC6368390)
Supplement: NIHMS1010303-supplement-1.pdf [file NIHMS1010303-supplement-1.pdf]

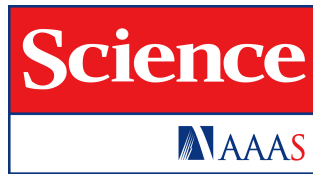

## Supplementary Materials for

### ***Rhomboid distorts lipids to break the viscosity-imposed speed limit of membrane diffusion***

Alex J.B. Kreutzberger, Ming Ji, Jesse Aaron, Ljubica Mihaljević, and Siniša Urban

correspondence to: [surban@jhmi.edu](mailto:surban@jhmi.edu)

#### **This PDF file includes:**

Tables S1, S2, and S3

References 47 – 60.

**Table S1. Mean diffusion coefficients of membrane proteins measured by single-particle tracking**

| <b>Protein</b>                    | <b>Mean diffusion coefficient (<math>\mu\text{m}^2/\text{s}</math>)</b> | <b>Source</b>                |
|-----------------------------------|-------------------------------------------------------------------------|------------------------------|
| Kv1.3                             | 0.0002                                                                  | (22)                         |
| AChR                              | 0.001                                                                   | (47)                         |
| CFTR                              | 0.005                                                                   | (48)                         |
| BK channel                        | 0.0067                                                                  | (24)                         |
| MHC class I                       | 0.0179                                                                  | (49)                         |
| Kv2.1                             | 0.02                                                                    | (21)                         |
| EGFR                              | 0.049                                                                   | (50)                         |
| band 3                            | 0.049                                                                   | (51)                         |
| GABA                              | 0.0524                                                                  | (52)                         |
| $\beta$ 2-AR                      | 0.0531                                                                  | (52)                         |
| HER2                              | 0.055                                                                   | (23)                         |
| $\beta$ 1-AR                      | 0.0648                                                                  | (52)                         |
| TGF $\beta$ -R1                   | 0.065                                                                   | (19)                         |
| GPC                               | 0.076                                                                   | (51)                         |
| AQP1                              | 0.09                                                                    | (53)                         |
| integrin $\alpha$ PS2C $\beta$ PS | 0.1                                                                     | (54)                         |
| CD4                               | 0.11                                                                    | (55)                         |
| $\alpha$ 3-GlyR                   | 0.13                                                                    | (56)                         |
| KCa3.1                            | 0.139                                                                   | (57)                         |
| TNF-R1                            | 0.14                                                                    | (58)                         |
| CaV1.2                            | 0.15                                                                    | (59)                         |
| Smo                               | 0.26                                                                    | (60)                         |
| TrkA                              | 0.47                                                                    | (20)                         |
| rhodopsin*                        | 0.5                                                                     | (25, 26)                     |
| Vrho                              | 0.69                                                                    | this study, 64 Hz frame rate |
| iRhom2                            | 0.75                                                                    | this study, 64 Hz frame rate |
| iRhom1                            | 0.81                                                                    | this study, 64 Hz frame rate |
| RHBDL2                            | 0.81                                                                    | this study, 64 Hz frame rate |
| DmRho4                            | 0.86                                                                    | this study, 25 Hz frame rate |
| TvR1                              | 0.97                                                                    | this study, 64 Hz frame rate |
| EhR1                              | 0.97                                                                    | this study, 64 Hz frame rate |

\*these classical studies did not use single-particle tracking, but are included because of their foundational nature

**Table S2: Spin probe accessibility parameters**

| Labelling site | $\Delta\text{N-GlpG}$ | $\Delta\text{N-GlpG}$        | GlpG                | GlpG                         |
|----------------|-----------------------|------------------------------|---------------------|------------------------------|
|                | $\Pi(\text{O}_2)^*$   | $\Pi(\text{NiEDDA})^\dagger$ | $\Pi(\text{O}_2)^*$ | $\Pi(\text{NiEDDA})^\dagger$ |
| I102R1         | $2.10 \pm 0.06$       | $0.37 \pm 0.07$              | $3.31 \pm 0.18$     | $0.39 \pm 0.15$              |
| I109R1         | $0.45 \pm 0.02$       | $0.44 \pm 0.03$              | $0.58 \pm 0.01$     | $0.41 \pm 0.05$              |
| F135R1         | $1.00 \pm 0.10$       | $0.43 \pm 0.20$              | $0.94 \pm 0.01$     | $0.27 \pm 0.10$              |
| L152R1         | $1.03 \pm 0.08$       | $0.75 \pm 0.03$              | $1.19 \pm 0.07$     | $0.73 \pm 0.22$              |
| L156R1         | $1.74 \pm 0.16$       | $0.57 \pm 0.02$              | $1.62 \pm 0.24$     | $0.66 \pm 0.09$              |
| Y187R1         | $2.00 \pm 0.10$       | $1.56 \pm 0.33$              | $2.00 \pm 0.07$     | $1.02 \pm 0.08$              |
| W212R1         | $1.03 \pm 0.29$       | $0.08 \pm 0.02$              | $1.12 \pm 0.40$     | $0.15 \pm 0.01$              |
| I235R1         | $6.64 \pm 0.23$       | $1.37 \pm 0.24$              | $5.89 \pm 0.11$     | $1.19 \pm 0.19$              |
| V238R1         | $1.40 \pm 0.12$       | $0.48 \pm 0.01$              | $1.24 \pm 0.02$     | $0.49 \pm 0.06$              |
| A263R1         | $1.63 \pm 0.02$       | $0.17 \pm 0.04$              | $1.62 \pm 0.13$     | $0.22 \pm 0.05$              |
| F266R1         | $3.80 \pm 0.27$       | $1.01 \pm 0.10$              | $3.65 \pm 0.49$     | $1.45 \pm 0.07$              |

\*Accessibility parameter for air (20% O<sub>2</sub>)

†Accessibility parameter for ~30-100 mM NiEDDA.

**Table S3: Accessibility and depth parameters**

| Labelling site | $\Delta\text{N-GlpG}$ | $\Delta\text{N-GlpG}$ | GlpG   | GlpG      |
|----------------|-----------------------|-----------------------|--------|-----------|
|                | $\Phi$                | Depth (Å)             | $\Phi$ | Depth (Å) |
| I102R1         | 1.77                  | 13.4                  | 2.22   | 15.6      |
| I109R1         | 0.03                  | 5.1                   | 0.38   | 6.5       |
| F135R1         | 0.96                  | 9.5                   | 1.34   | 11.3      |
| L152R1         | 0.31                  | 6.4                   | 0.53   | 7.4       |
| L156R1         | 1.12                  | 10.3                  | 0.89   | 9.2       |
| Y187R1         | 0.27                  | 6.2                   | 0.68   | 8.2       |
| W212R1         | 2.50                  | 16.9                  | 1.93   | 14.4      |
| I235R1         | 1.59                  | 12.5                  | 1.62   | 12.7      |
| V238R1         | 1.06                  | 10.0                  | 0.94   | 9.4       |
| A263R1         | 2.29                  | 15.9                  | 1.97   | 14.4      |
| F266R1         | 1.33                  | 11.3                  | 0.92   | 9.3       |

$$\text{depth (\AA)} = 4.81\Phi + 4.9$$
